# Supplementary material
Source: PubMed Central journal article supplement (PMC8753295)
Supplement: mmc1.pdf [file mmc1.pdf]

YMTHE, Volume 30

## **Supplemental Information**

**lncRNA Inc-POP1-1 upregulated by VN1R5 promotes  
cisplatin resistance in head and neck squamous  
cell carcinoma through interaction with MCM5**

**Yingying Jiang, Haiyan Guo, Tong Tong, Fei Xie, Xing Qin, Xiaoning Wang, Wantao  
Chen, and Jianjun Zhang**

# 1 Supplementary Figures

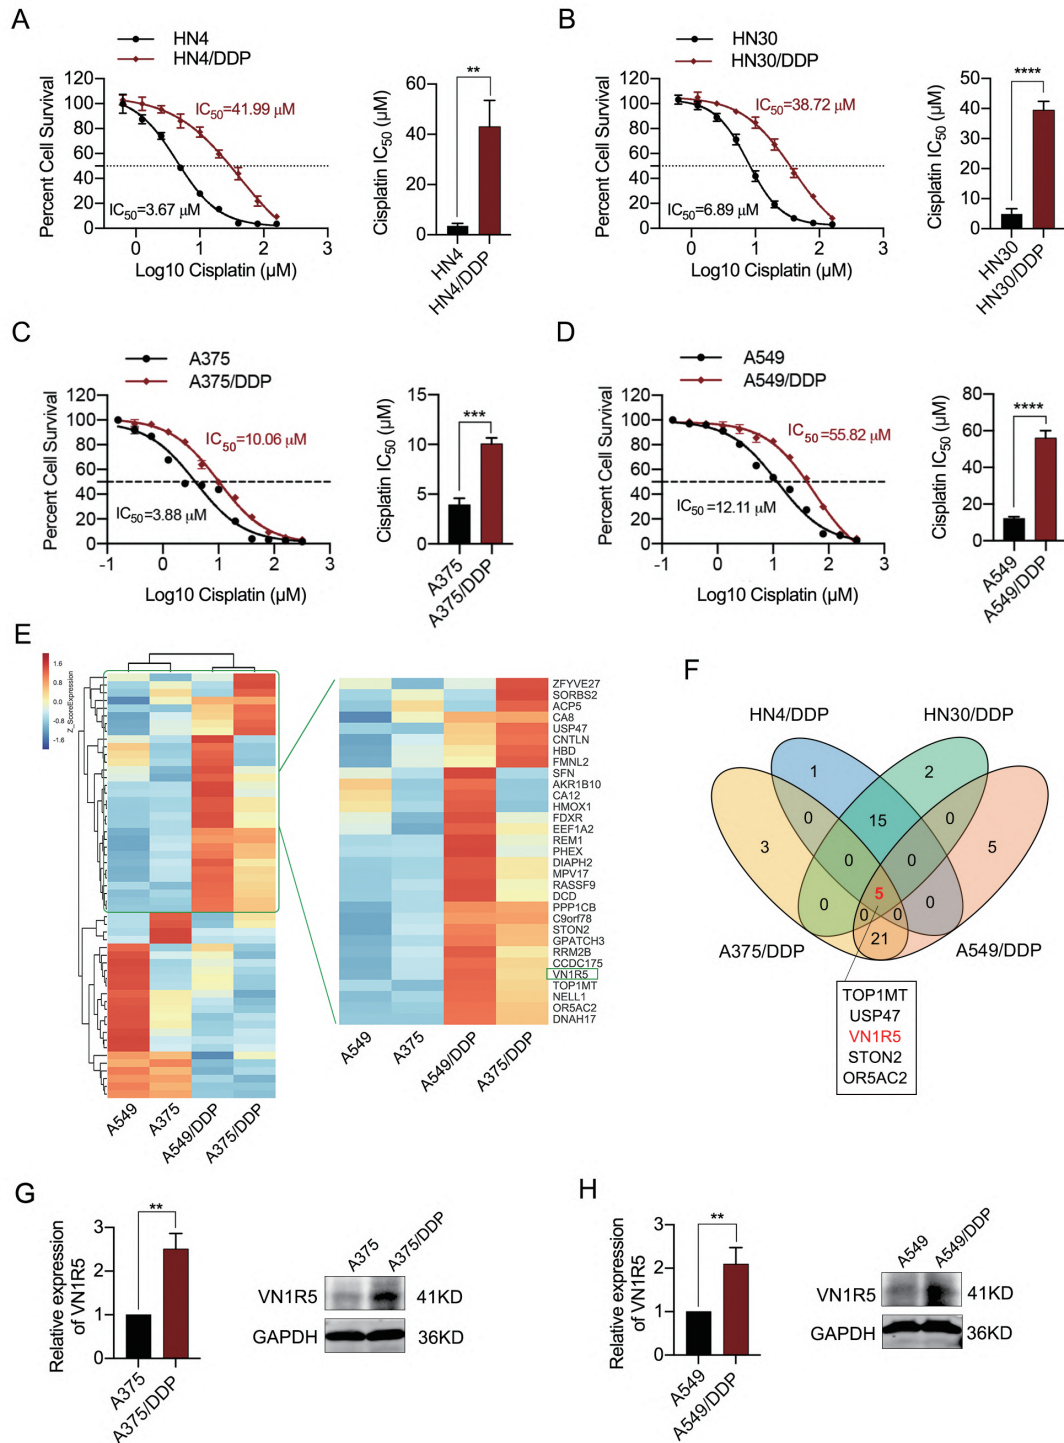

2

3 **Figure S1. Cisplatin-induced resistance in HNSCC and A375/A549 cells. VN1R5**

4 **expression and cell survival were measured.**

1 A. IC<sub>50</sub> values of cisplatin in cisplatin-sensitive and -resistant HN4 cells established  
2 for microarray analysis and subsequent experiments.

3 B. IC<sub>50</sub> values of cisplatin in cisplatin-sensitive and -resistant HN30 cells established  
4 for microarray analysis and subsequent experiments.

5 C. IC<sub>50</sub> values of cisplatin in cisplatin-sensitive and -resistant A375 cells established  
6 for microarray analysis.

7 D. IC<sub>50</sub> values of cisplatin in cisplatin-sensitive and -resistant A549 cells established  
8 for microarray analysis.

9 E. Microarray analysis of cisplatin-sensitive/-resistant A375 and A549 cells. VN1R5  
10 was upregulated in cisplatin-resistant HNSCC cells.

11 F. VN1R5 was one of the upregulated proteins in the four cisplatin-resistant cell lines.

12 G. VN1R5 expression was measured by qPCR and Western blotting in  
13 cisplatin-sensitive and -resistant A375 cells.

14 H. VN1R5 expression was measured by qPCR and Western blotting in  
15 cisplatin-sensitive and -resistant A549 cells.

16 \*\*  $p < 0.01$ , \*\*\*  $p < 0.001$ , \*\*\*\*  $p < 0.0001$ . Error bars, means  $\pm$  SDs.

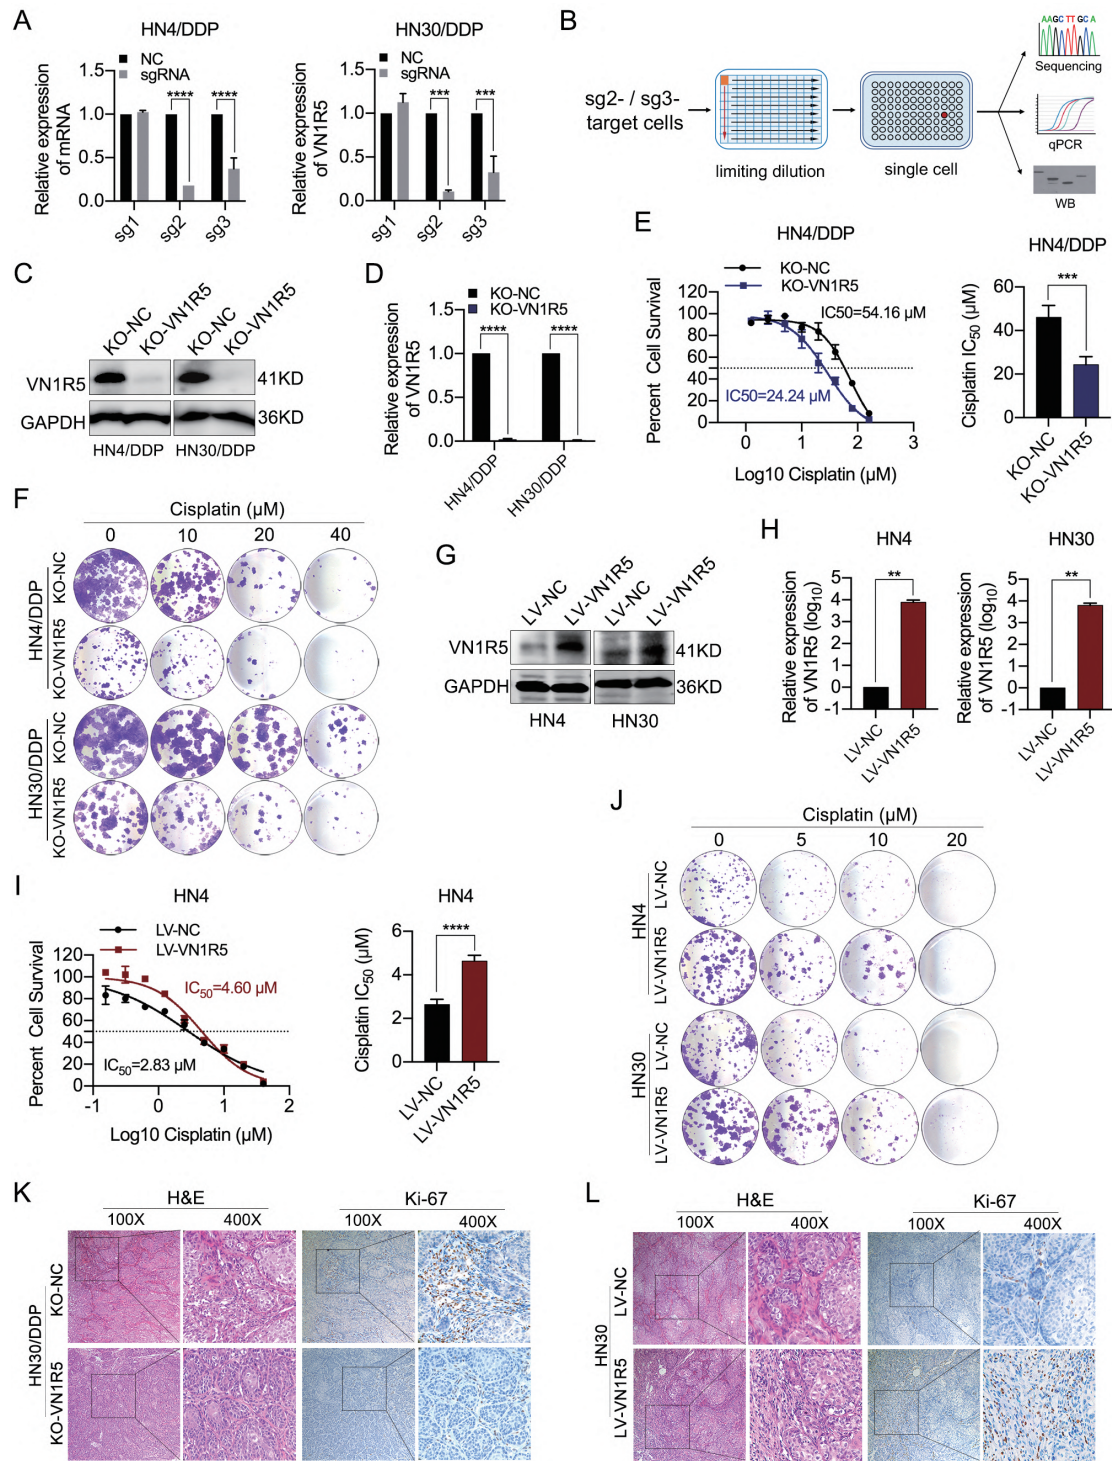

1

2 **Figure S2. Effect of VN1R5 on cisplatin resistance in HNSCC cells.**

3 A. The knockdown efficiency was analyzed by qPCR in HN4/DDP and HN30/DDP

4 cells stably transfected with the targeted sgRNA CRISPR/Cas9 vector.

1 B. Procedure of VN1R5 KO in HNSCC cells. HN4/DDP and HN30/DDP stably  
2 transfected with sg2- and sg3-targeted vectors were used for further screening and  
3 verification. The limited dilution method was used to obtain single cells, after which  
4 VN1R5 expression analysis and DNA sequencing were performed.

5 C. After selection of the cell clones grown from single cells, the KO efficiency of  
6 VN1R5 was verified by Western blotting.

7 D. After selection of the cell clones grown from single cells, the KO efficiency of  
8 VN1R5 was verified by qPCR.

9 E. Compared with NC-transfected cells (black line), HN4/DDP cells with VN1R5  
10 downregulation were sensitized to cisplatin (blue line). The IC<sub>50</sub> values are shown on  
11 the right.

12 F. The colony formation ability of KO-VN1R5 HN4/DDP and HN30/DDP cells  
13 treated with a specific cisplatin concentration gradient is shown.

14 G. The relative expression levels of VN1R5 in HN4 and HN30 cells stably transduced  
15 with LV-VN1R5 were measured by Western blotting.

16 H. The relative expression levels of VN1R5 in HN4 and HN30 cells stably transduced  
17 with the VN1R5 lentiviral vector (LV-VN1R5) were measured by qPCR.

18 I. Compared with NC-transfected cells (black line), HN4 cells with VN1R5  
19 upregulation (red line) exhibited cisplatin resistance. The IC<sub>50</sub> values are shown on  
20 the right.

1 J. The colony formation ability of VN1R5-overexpressing HN4 and HN30 cells  
 2 treated with a specific cisplatin concentration gradient is shown.  
 3 K. H&E and Ki-67 staining of xenograft tissues from the KO-VN1R5 and KO-NC  
 4 groups. Scale bar: 100  $\mu$ m.  
 5 L. H&E and Ki-67 staining of xenograft tissues from the LV-VN1R5 and LV-NC  
 6 groups. Scale bar: 100  $\mu$ m.  
 7 \*\*  $p < 0.01$ , \*\*\*  $p < 0.001$ , \*\*\*\*  $p < 0.0001$ . Error bars, means  $\pm$  SDs.  
 8 (NC, negative control; KO, knockout; LV, lentiviral vector)

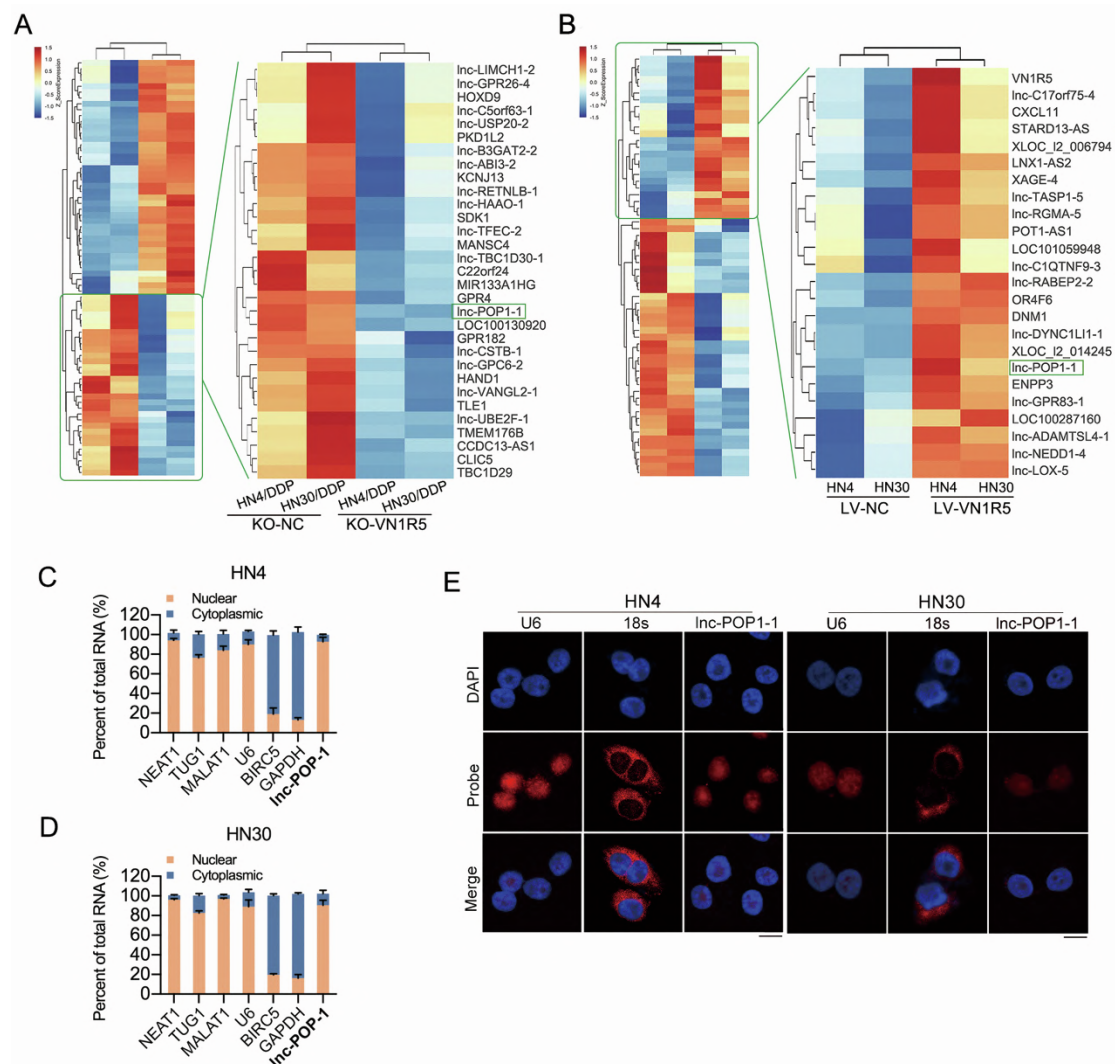

9  
 10 **Figure S3. Inc-POP1-1 expression and localization in HNSCC cells.**

1 A. Microarray analysis to assess the gene expression profiles of KO-VN1R5  
2 HN4/DDP and HN30/DDP cells.

3 B. Microarray analysis to assess the gene expression profiles of  
4 VN1R5-overexpressing (LV-VN1R5) HN4 and HN30 cells.

5 C. Cell nuclear/cytoplasmic fractionation and qPCR showed the cellular distribution  
6 of lnc-POP1-1 in HN4 cells. NEAT1, TUG1, MALAT1, U6, BIRC5 and GAPDH  
7 were used as separation quality standards and endogenous controls, as appropriate.

8 D. Cell nuclear/cytoplasmic fractionation and qPCR showed the cellular distribution  
9 of lnc-POP1-1 in HN30 cells. NEAT1, TUG1, MALAT1, U6, BIRC5 and GAPDH  
10 were used as separation quality standards and endogenous controls, as appropriate.

11 Error bars, means  $\pm$  SDs.

12 E. FISH analysis of lnc-POP1-1 in HN4 and HN30 cells. (The nuclei were stained  
13 with DAPI. U6 and 18S rRNA were used as nuclear and cytoplasmic markers,  
14 respectively. Scale bar: 10  $\mu$ m.)

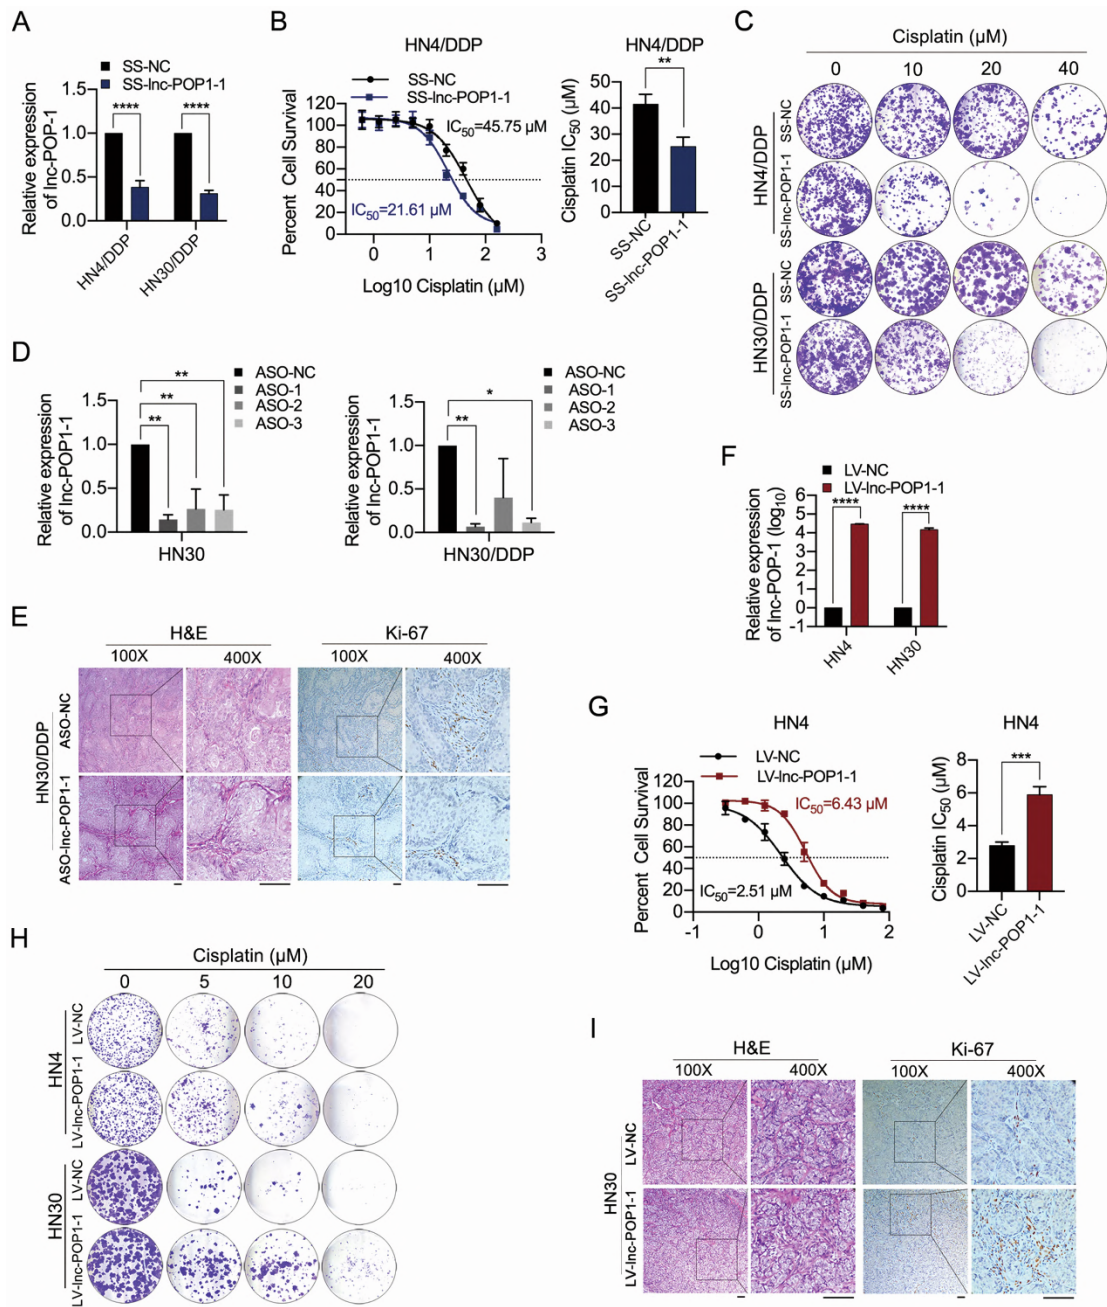

1

2 **Figure S4. Effect of lnc-POP1-1 on cisplatin resistance in HNSCC cells.**

3 A. The relative expression levels of lnc-POP1-1 in HN4/DDP and HN30/DDP cells  
 4 transfected with SS-lnc-POP1-1 were determined by qPCR.

5 B. Compared with NC-transfected cells (black line), HN4/DDP cells with lnc-POP1-1  
 6 downregulation were sensitized to cisplatin (blue line). The IC<sub>50</sub> values are shown on  
 7 the right.



1 C. The colony formation ability of lnc-POP1-1-silenced HN4/DDP and HN30/DDP  
2 cells treated with a specific cisplatin concentration gradient is shown.

3 D. The silencing efficiency of ASO-lnc-POP1-1 (ASO-1, ASO-2 and ASO-3) in  
4 HN30 and HN30/DDP cells was determined by qPCR.

5 E. H&E and Ki-67 staining of xenograft tissues from the ASO-lnc-POP1-1 and  
6 ASO-NC groups. Scale bar: 100  $\mu$ m.

7 F. The relative expression levels of lnc-POP1-1 in HN4 and HN30 cells stably  
8 transduced with the LV-lnc-POP1-1 vector were determined by qPCR.

9 G. Compared with NC-transfected cells (black line), HN4 cells with lnc-POP1-1  
10 upregulation were resistant to cisplatin (red line). The IC<sub>50</sub> values are shown on the  
11 right.

12 H. The colony formation ability of lnc-POP1-1-overexpressing HN4 and HN30 cells  
13 treated with a specific cisplatin concentration gradient is shown.

14 I. H&E and Ki-67 staining of xenograft tissues from the LV-lnc-POP1-1 and LV-NC  
15 groups. Scale bar: 100  $\mu$ m.

16 \*  $p < 0.05$ , \*\*  $p < 0.01$ , \*\*\*  $p < 0.001$ , \*\*\*\*  $p < 0.0001$ . Error bars, means  $\pm$  SDs.

17 (NC, negative control; SS, Smart Silencer; LV, lentiviral vector; ASO, antisense  
18 oligonucleotide)

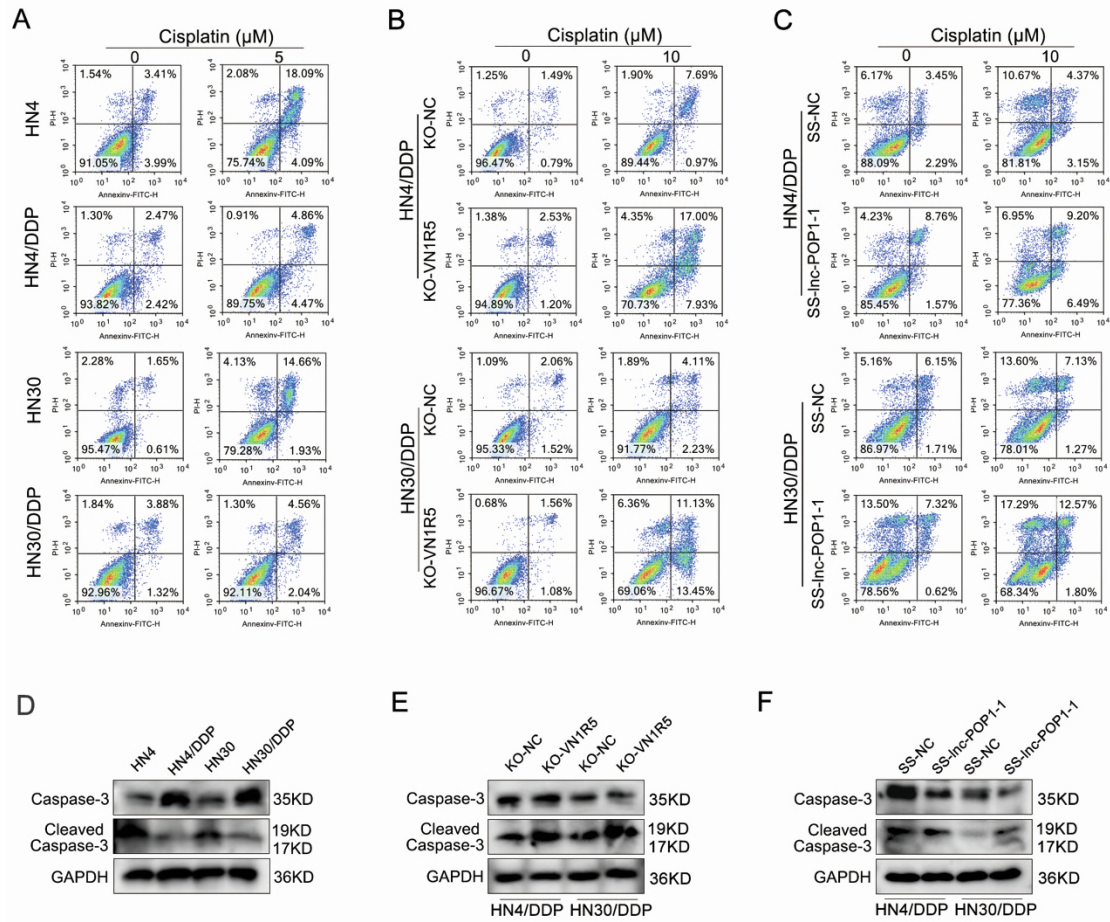

1

2 **Figure S5. VN1R5 and lnc-POP1-1 affect HNSCC cell apoptosis.**

3 A. Apoptosis was detected using flow cytometry in cisplatin-sensitive/-resistant HN4  
4 and HN30 cells treated with 0 or 5  $\mu\text{M}$  cisplatin for 48 h.

5 B. Apoptosis was detected using flow cytometry in HN4/DDP and HN30/DDP cells  
6 treated with 0 or 10  $\mu\text{M}$  cisplatin after KO of VN1R5.

7 C. Apoptosis was detected using flow cytometry in HN4/DDP and HN30/DDP cells  
8 treated with 0 or 10  $\mu\text{M}$  cisplatin after knockdown of lnc-POP1-1.

9 D. The expression level of Cleaved Caspase-3 was analyzed by Western blotting in  
10 cisplatin-sensitive/-resistant HN4 and HN30 cells treated with 5  $\mu\text{M}$  cisplatin for 24 h.

1 E. The expression level of Cleaved Caspase-3 was analyzed by Western blotting in  
 2 KO-VN1R5 HN4/DDP and HN30/DDP cells treated with 10  $\mu$ M cisplatin.  
 3 F. The expression level of Cleaved Caspase-3 was analyzed by Western blotting in  
 4 HN4/DDP and HN30/DDP cells treated with 10  $\mu$ M cisplatin after knockdown of  
 5 Inc-POP1-1.  
 6 (NC, negative control; SS, Smart Silencer; LV, lentiviral vector; KO, knockout)

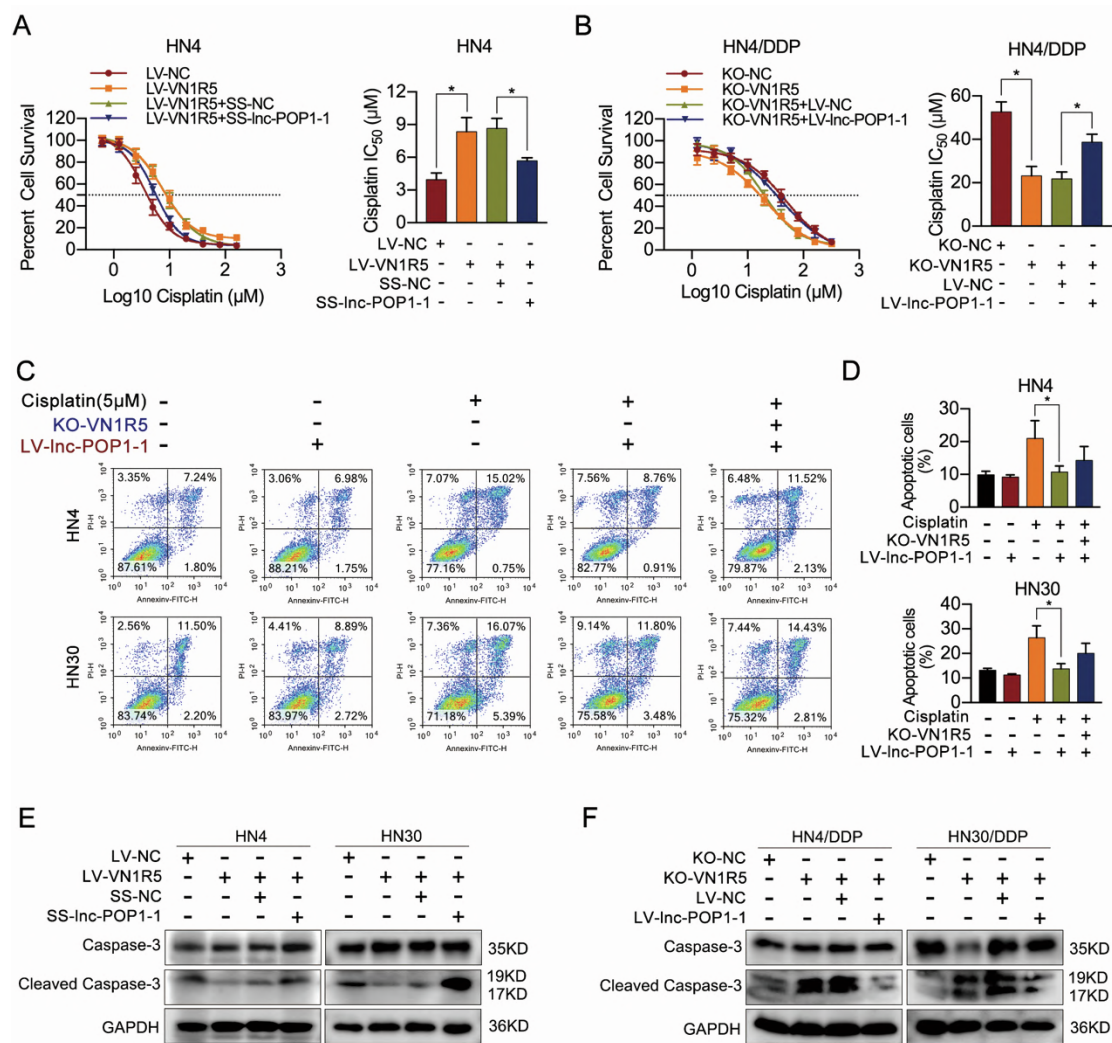

7  
 8 **Figure S6. Inc-POP1-1 was regulated by VN1R5 to affect cisplatin resistance in**  
 9 **HNSCC cells.**

1 A. Cell viability was detected by CCK-8 assays when lnc-POP1-1 was knocked down  
2 in HN4 cells stably transfected with LV-VN1R5. The IC<sub>50</sub> values are shown on the  
3 right.

4 B. Cell viability was detected by CCK-8 assay when lnc-POP1-1 was overexpressed  
5 in KO-VN1R5 HN4/DDP cells. The IC<sub>50</sub> values are shown on the right.

6 C, D. Apoptosis was detected using flow cytometry in lnc-POP1-1-overexpressing  
7 HN4 and HN30 cells treated with 0 or 5 μM cisplatin after KO of VN1R5.

8 E. The expression level of Cleaved Caspase-3 was analyzed by Western blotting in  
9 VN1R5-overexpressing HN4 and HN30 cells treated with 5 μM cisplatin after  
10 knockdown of lnc-POP1-1.

11 F. The expression level of Cleaved Caspase-3 was analyzed by Western blotting in  
12 KO-VN1R5 HN4/DDP and HN30/DDP cells treated with 10 μM cisplatin after  
13 overexpressing lnc-POP1-1.

14 \*  $p < 0.05$ . Error bars, means  $\pm$  SDs.

15 (NC, negative control; SS, Smart Silencer; LV, lentiviral vector; KO, knockout)

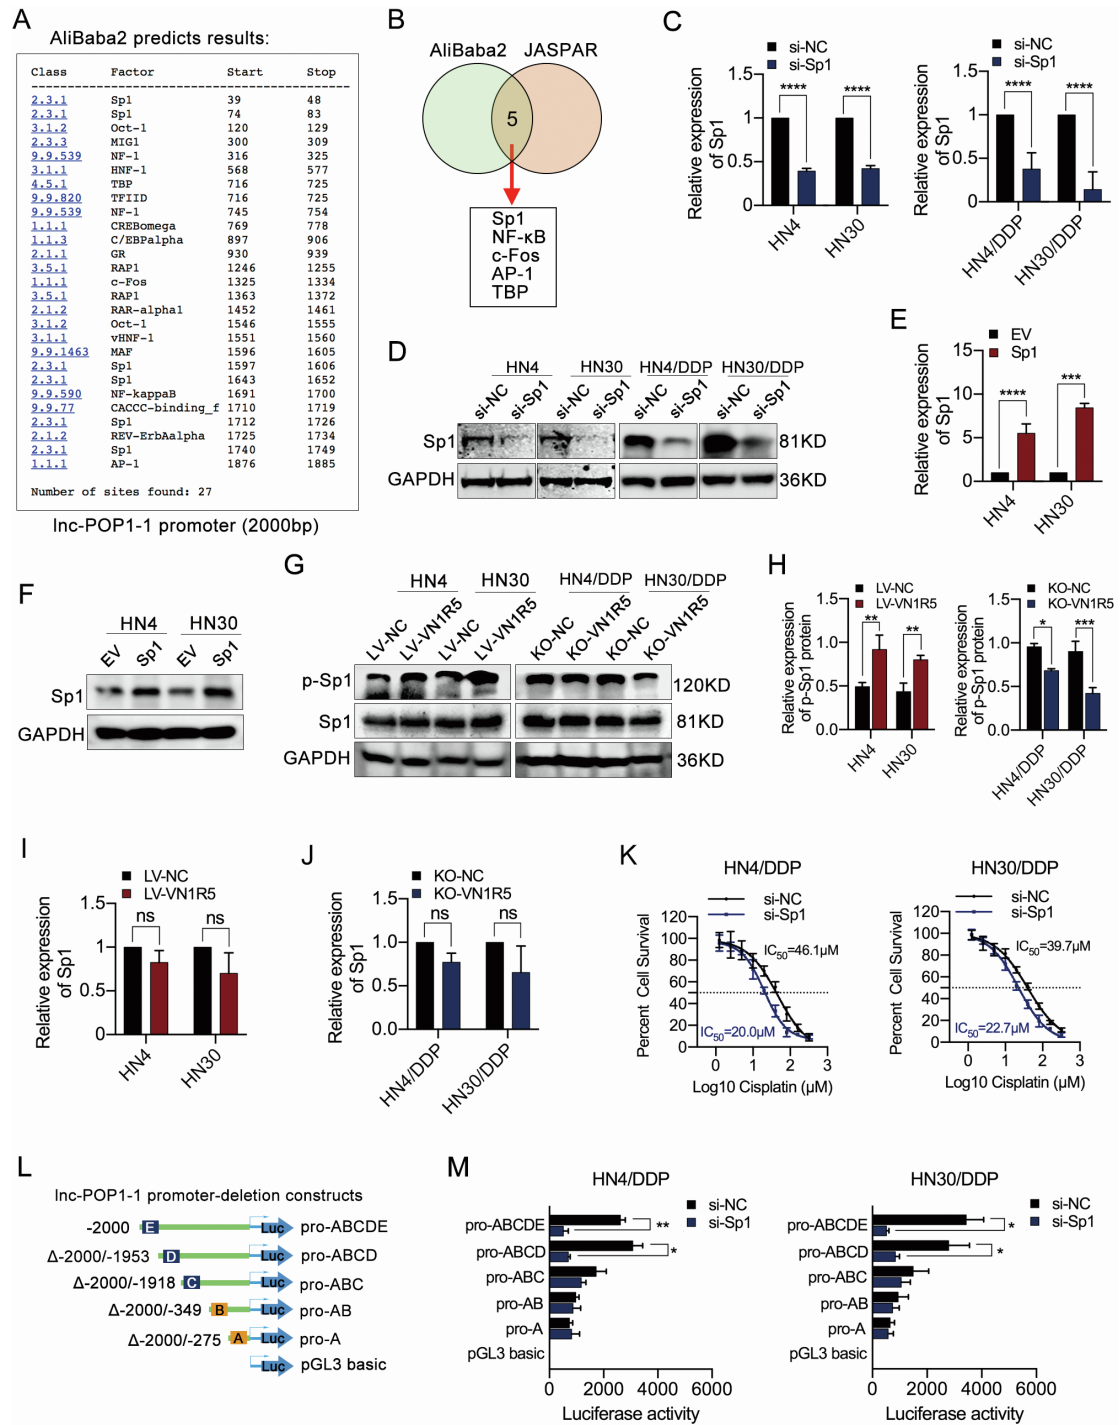

1

2 **Figure S7. Sp1 promoter activity of Sp1 and Inc-POP1-1 expression regulation**  
 3 **by VN1R5.**

4 A. Prediction of the TFs of Inc-POP1-1 with AliBaba2.1

5 (<http://gene-regulation.com/pub/programs/alibaba2/index.html>).

1 B. The common predicted TFs were analyzed with AliBaba2.1 and JASPAR  
2 (<http://jaspar.genereg.net>).

3 C, D. The relative expression levels of Sp1 in cisplatin-sensitive and -resistant  
4 HNSCC cells transfected with si-Sp1 were determined by qPCR (C) and Western  
5 blotting (D).

6 E, F. The relative expression levels of Sp1 in HN4 and HN30 cells transfected with  
7 the Sp1 vector were determined by qPCR (E) and Western blotting (F).

8 G. Sp1 expression were analyzed by Western blotting in HNSCC cells transfected  
9 with LV-VN1R5 or KO-VN1R5.

10 H. The relative intensity of p-Sp1 expression in HNSCC cells with VN1R5  
11 overexpression or knockout was analyzed.

12 I. Sp1 expression was analyzed by qPCR in HNSCC cells transfected with  
13 LV-VN1R5.

14 J. Sp1 expression was analyzed by qPCR in HNSCC cells transfected with  
15 KO-VN1R5.

16 K. Compared with NC-transfected cells (black line), HN4/DDP and HN30/DDP cells  
17 with Sp1 downregulation were sensitized to cisplatin (blue line).

18 L. 5' serial deletion constructs for the promoter region of the lnc-POP1-1 gene were  
19 constructed.

20 M. Relative luciferase activity of different lnc-POP1-1 promoter constructs (5'  
21 deletions) in HN4/DDP and HN30/DDP cells cotransfected with si-Sp1 or si-NC.

1 \*  $p < 0.05$ , \*\*  $p < 0.01$ , \*\*\*  $p < 0.001$ , \*\*\*\*  $p < 0.0001$ . Error bars, means  $\pm$  SDs.  
 2 (NC, negative control; si, siRNA; EV, empty vector; LV, lentiviral vector; KO, knock  
 3 out; p-Sp1, phosphorylated Sp1)

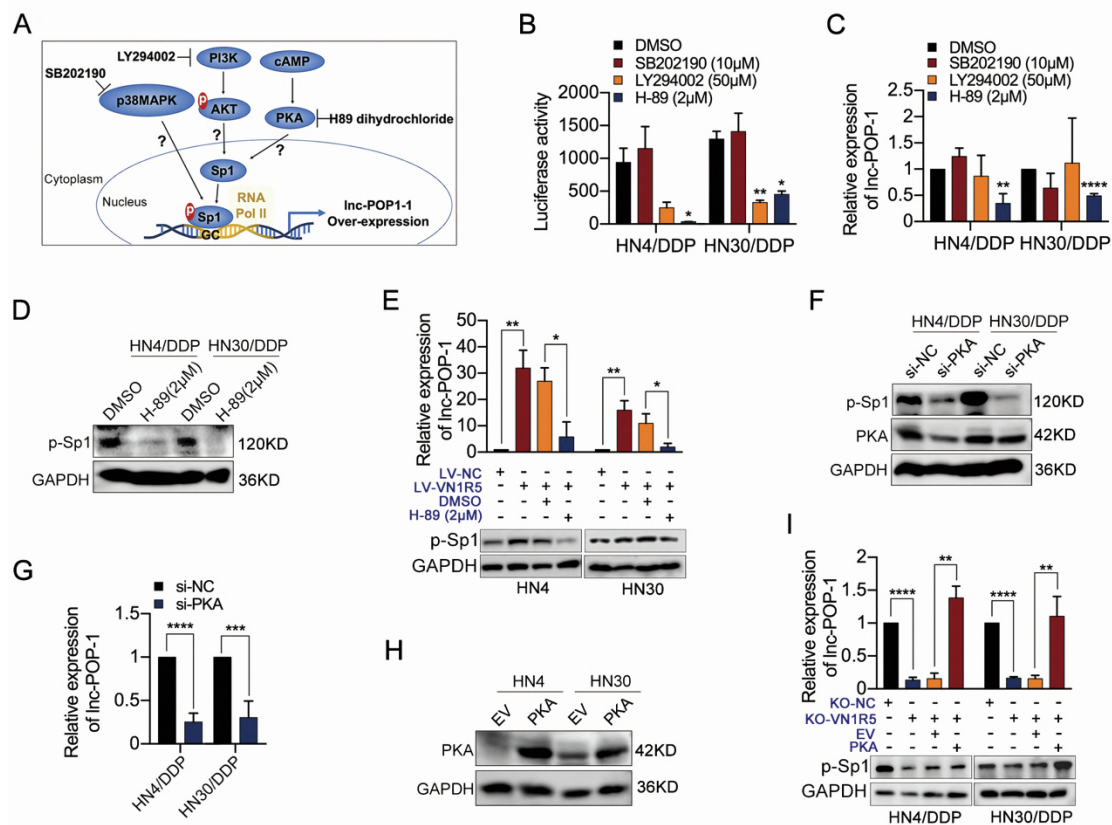

4  
 5 **Figure S8. The promoter activity of Sp1 and the expression of lnc-POP1-1**  
 6 **regulated by VN1R5 were affected by the cAMP/PKA pathway.**

7 A. Main pathways and their inhibitors that may affect the promoter activity of Sp1.  
 8 B. The luciferase activity of the lnc-POP1-1 promoter was measured in  
 9 cisplatin-resistant HNSCC cells treated with inhibitors (LY294002, SB202190 and  
 10 H-89 dihydrochloride).  
 11 C. lnc-POP1-1 expression was analyzed by qPCR in cisplatin-resistant HNSCC cells  
 12 treated with inhibitors (LY294002, SB202190 and H-89 dihydrochloride).

1 D. The expression levels of phosphorylated Sp1 were analyzed by Western blotting in  
2 cisplatin-resistant HNSCC cells treated with a cAMP/PKA pathway inhibitor (H-89  
3 dihydrochloride, 2  $\mu$ M).

4 E. The levels of lnc-POP1-1 and phosphorylated Sp1 were measured in  
5 VN1R5-overexpressing HNSCC cells treated with H-89 dihydrochloride (2  $\mu$ M).

6 F. The levels of phosphorylated Sp1 were measured in HN4/DDP and HN30/DDP  
7 cells treated with si-PKA by Western blotting.

8 G. The levels of lnc-POP1-1 were measured in HN4/DDP and HN30/DDP cells  
9 treated with si-PKA by qPCR.

10 H. The relative expression levels of PKA in HN4 and HN30 cells transfected with  
11 PKA-C $\alpha$  vector (PKA) were determined by Western blotting.

12 I. The levels of lnc-POP1-1 and phosphorylated Sp1 were measured in KO-VN1R5  
13 HNSCC cells treated with the PKA vector.

14 \*  $p < 0.05$ , \*\*  $p < 0.01$ , \*\*\*  $p < 0.001$ , \*\*\*\*  $p < 0.0001$ . Error bars, means  $\pm$  SDs.

15 (NC, negative control; si, siRNA; EV, empty vector; LV, lentiviral vector; KO,  
16 knockout; p-Sp1, phosphorylated Sp1; H-89, H-89 dihydrochloride; PKA, PKA-C $\alpha$ )



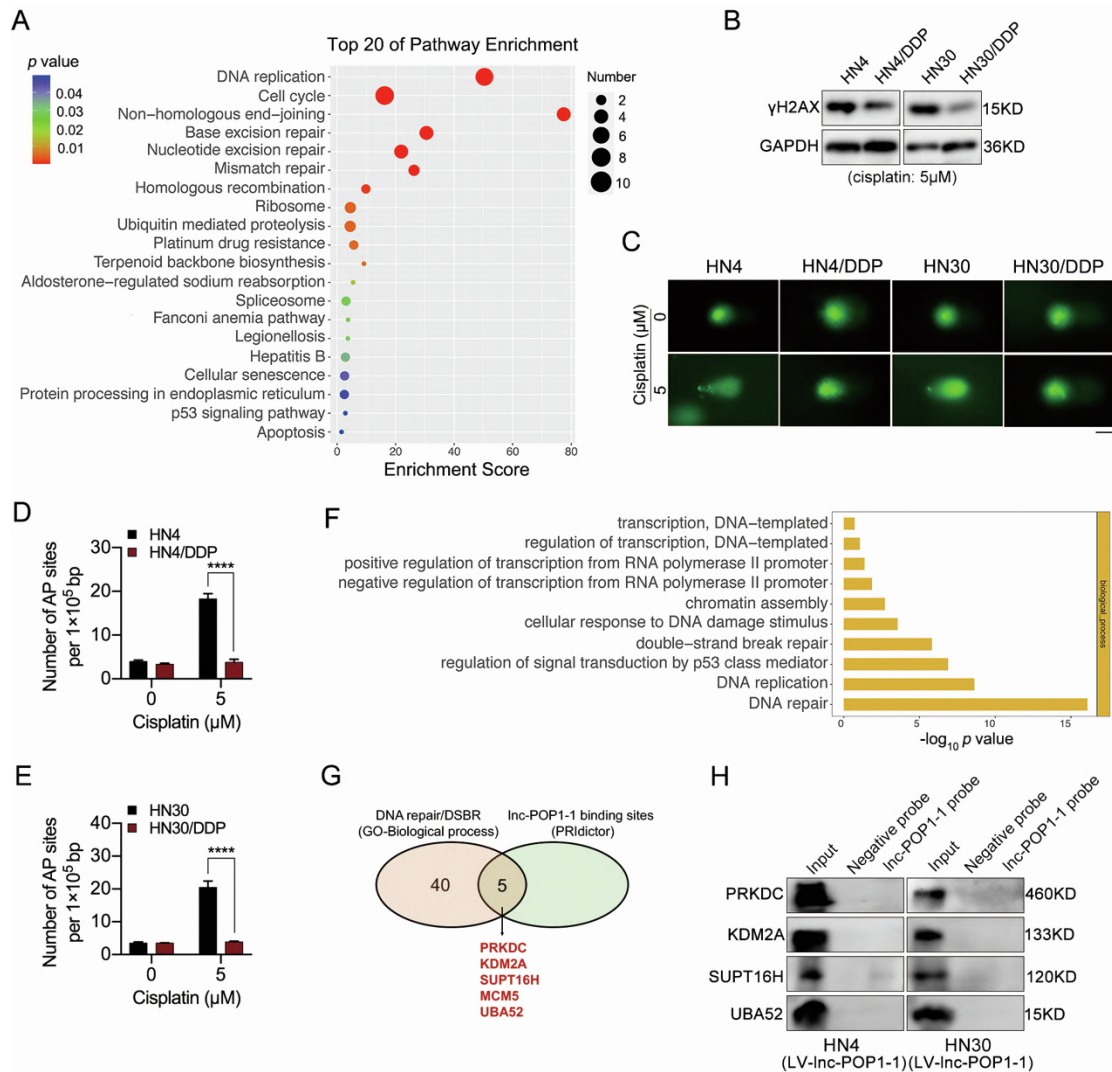

1

2 **Figure S9. Inc-POP1-1 participated in DNA repair pathways.**

3 A. Pathway analysis demonstrated that RBPs of Inc-POP1-1 were involved in several  
4 DNA repair pathways in humans.

5 B.  $\gamma$ H2AX expression was measured by Western blotting in  
6 cisplatin-resistant/cisplatin-sensitive HN4 and HN30 cells.

7 C. Representative images of the alkaline comet assays to analyze DNA damage in  
8 cisplatin-resistant/cisplatin-sensitive HN4 and HN30 cells. Scale bar: 20  $\mu$ m.

1 D, E. Following exposure to 0  $\mu$ M or 5  $\mu$ M cisplatin for 24 h, the AP sites of  
2 cisplatin-resistant/cisplatin-sensitive HN4 (D) and HN30 (E) cells were quantified  
3 using an AP site counting kit to analyze DNA damage.

4 F. GO analysis data including the predicted biological processes of RBPs of  
5 lnc-POP1-1.

6 G. According to the protein characteristics and predicted binding sites for lnc-POP1-1,  
7 5 predicted proteins (PRKDC, MCM5, SUPT16H, KDM2A and UBA52) were  
8 selected for subsequent experimental validation.

9 H. RNA pull-down plus Western blot analyses showed that PRKDC, SUPT16H,  
10 KDM2A and UBA52 could not be pulled down by lnc-POP1-1 probes in HN4 and  
11 HN30 cells transfected with LV-lnc-POP1-1.

12 \*\*\*\*  $p < 0.0001$ . Error bars, means  $\pm$  SDs.

13 (LV, lentiviral vector)

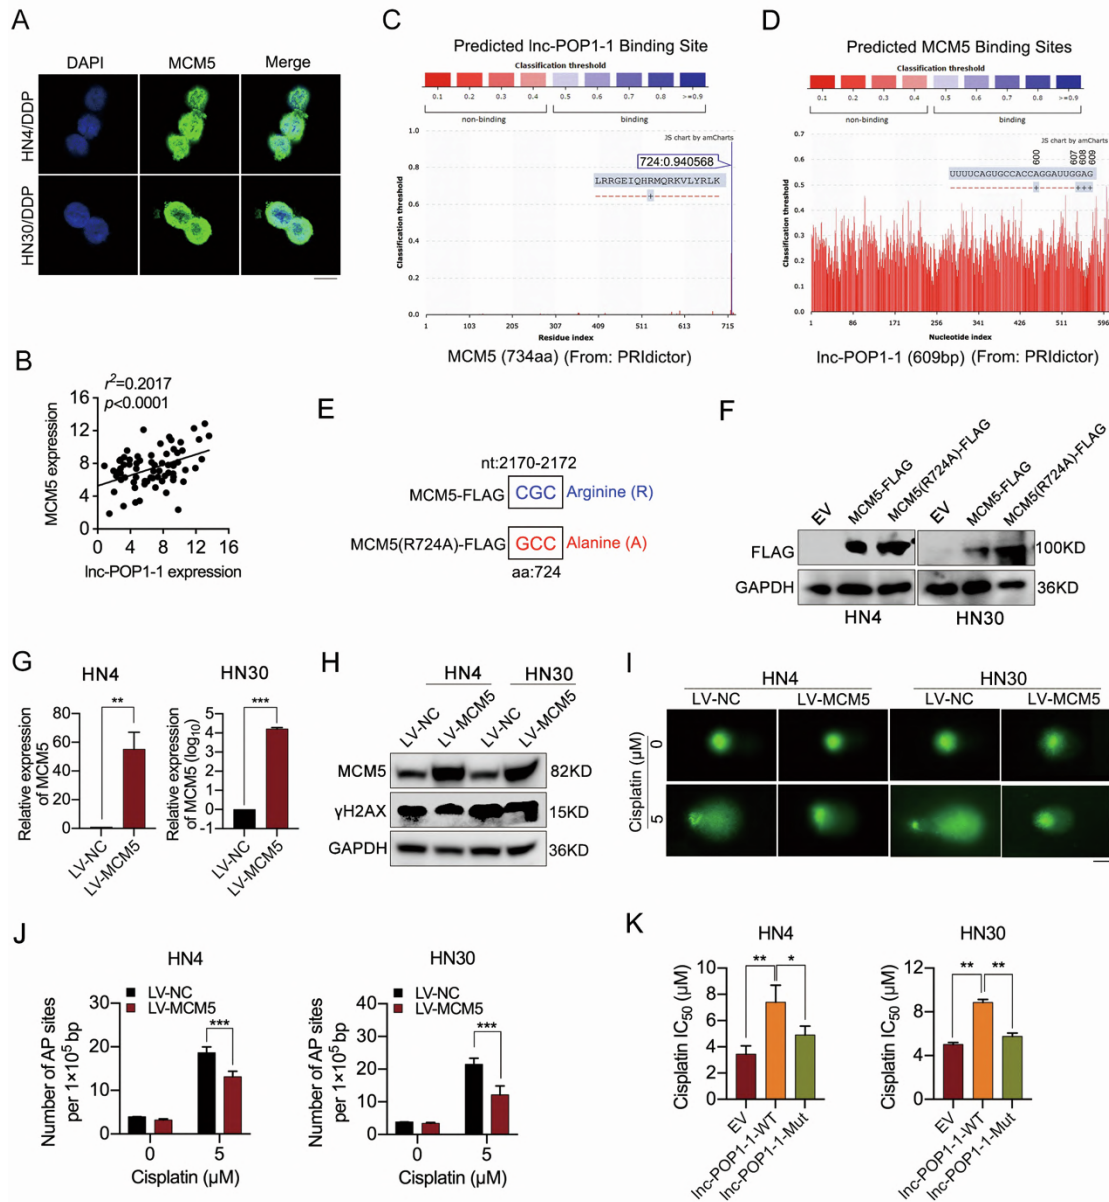

1

2 **Figure S10. Inc-POP1-1 physically interacted with MCM5 and participated in**  
 3 **DNA repair pathways.**

4 A. IF analysis of MCM5 in HN4/DDP and HN30/DDP cells. Scale bar: 10 μm.

5 B. Pearson correlation analysis of the expression of Inc-POP1-1 and MCM5 in  
 6 HNSCC tissue.  $r^2 = 0.2017$ ,  $n = 70$ .

7 C. The predicted Inc-POP1-1 binding site of MCM5 was obtained from the PRIdictor

8 database (<http://bclab.inha.ac.kr/pridictor>).

1 D. The predicted MCM5-binding sites of lnc-POP1-1 were obtained from the  
2 PRIdictor database (<http://bclab.inha.ac.kr/pridictor>).

3 E. Construction of the MCM5-FLAG-Mut vector MCM5(R724)-FLAG, which  
4 mutated CGC to GCC at base pairs 2170 to 2172.

5 F. The relative expression of MCM5 was detected by Western blotting in HN4 and  
6 HN30 cells transfected with the MCM5-FLAG-WT and MCM5-Mut vectors.

7 G. The relative expression of MCM5 was detected by qPCR in HN4 and HN30 cells  
8 stably transduced with LV-MCM5.

9 H. The expression of MCM5 and  $\gamma$ H2AX was detected by Western blotting in HN4  
10 and HN30 cells stably transduced with LV-MCM5.

11 I. Representative images of the alkaline comet assays used to analyze DNA damage in  
12 HN4 and HN30 cells overexpressing MCM5. Scale bar: 20  $\mu$ m.

13 J. Following exposure to 0  $\mu$ M or 5  $\mu$ M cisplatin for 24 h, the AP sites of HN4 and  
14 HN30 cells overexpressing MCM5 were quantified using an AP site counting kit to  
15 analyze DNA damage.

16 K. Compared with the WT plasmid, the lnc-POP1-1 mutant plasmid endowed HN4  
17 and HN30 cells with sensitivity to cisplatin. The IC<sub>50</sub> values are shown.

18 \*  $p < 0.05$ , \*\*  $p < 0.01$ , \*\*\*  $p < 0.001$ . Error bars, means  $\pm$  SDs.

19 (LV, lentiviral vector; NC, negative control; SS, Smart Silencer; EV, empty vector;  
20 WT, wild-type; Mut, mutation)

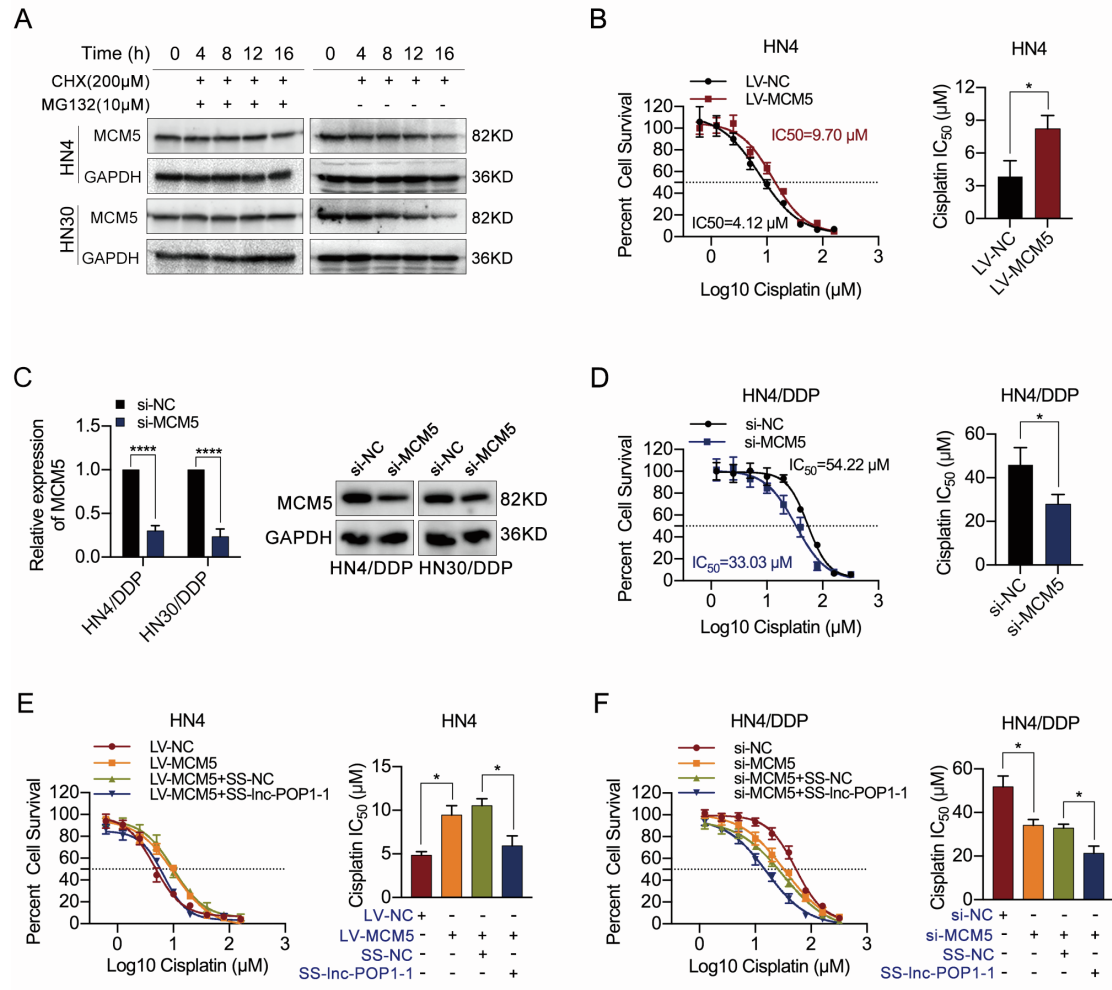

1

2 **Figure S11. MCM5 affected the DNA repair and cisplatin resistance of HNSCC**  
 3 **cells by interacting with lnc-POP1-1.**

4 A. Proteins were isolated every 4 h from HN4 and HN30 cells treated with 10  $\mu$ M  
 5 or/and 200  $\mu$ M CHX for 0-16 h and analyzed by Western blotting.

6 B. Compared with NC-transfected cells (black line), HN4 cells with MCM5  
 7 upregulation exhibited resistance to cisplatin (red line). The IC<sub>50</sub> values are shown on  
 8 the right.

9 C. The relative expression of MCM5 was detected by qPCR and Western blotting in  
 10 HN4/DDP and HN30/DDP cells transfected with si-MCM5.

1 D. Compared with NC-transfected cells (black line), HN4/DDP cells with MCM5  
2 downregulation were sensitized to cisplatin (blue line). The IC<sub>50</sub> values are shown on  
3 the right.

4 E. Cell viability was detected by CCK-8 assays when lnc-POP1-1 was knocked down  
5 in HN4 cells stably transfected with LV-MCM5. The IC<sub>50</sub> values are shown on the  
6 right.

7 F. Cell viability was detected by CCK-8 assays when lnc-POP1-1 and MCM5 were  
8 both knocked down in HN4/DDP cells. The IC<sub>50</sub> values are shown on the right.

9 \*  $p < 0.05$ , \*\*\*\*  $p < 0.0001$ . Error bars, means  $\pm$  SDs.

10 (NC, negative control; si, siRNA; LV, lentiviral vector; SS, Smart Silencer)

11

1 **Supplementary Tables**

2 **Table S1.** Sequences of qPCR primers.

| <b>Primers</b> |         | <b>Sequences (5'-3')</b>  |
|----------------|---------|---------------------------|
| VN1R5          | Forward | TTCAGTCACAGGTCTAAGTCCA    |
|                | Reverse | ACCAAAGAAGTCTAAGGACACCA   |
| Inc-POP1-1     | Forward | CAGAAATCATGAGAGATCATCAGTG |
|                | Reverse | AAGGAGGTAGATTGGAATCCAGG   |
| GAPDH          | Forward | GAACGGGAAGCTCACTGG        |
|                | Reverse | GCCTGCTTCACCACCTTCT       |
| U6             | Forward | CTCGCTTCGGCAGCACATATACT   |
|                | Reverse | ATTTGCGTGTCATCCTTGCGCA    |
| TUG1           | Forward | TCCTTGTTTAGTGCATCTTTGCC   |
|                | Reverse | TGAGTGGTTATTCTGATAGCCTGC  |
| NEAT1          | Forward | GCATACGCAGCAGATCAGCAT     |
|                | Reverse | CCCACAATATAGGCATTTACAAGG  |
| MALAT1         | Forward | CCTAACCAGGCATAACACAGAAT   |
|                | Reverse | CGAATGGCTTTGTCTCCGAA      |
| BIRC5          | Forward | GCAATGTCTTAGGAAAGGAGATCA  |
|                | Reverse | AGAGAAGCAGCCACTGTTACCA    |
| Sp1            | Forward | GGCAATAACCAGTCCACACCAC    |
|                | Reverse | GCATTTACCCACACAGCCC       |
| MCM5           | Forward | TGGACTGACAGCCTCGGTGATG    |
|                | Reverse | GGATTGCCACACGGTCATCTTCTC  |

1 **Table S2.** Relationship between VN1R5 level and clinicopathologic features (N=83)

| Characteristics              | No. of Patients |       | VN1R5 $\Delta$ Ct <sup>a</sup><br>Mean $\pm$ SD | Non-parametric<br>test value | P value        |
|------------------------------|-----------------|-------|-------------------------------------------------|------------------------------|----------------|
|                              | No.             | %     |                                                 |                              |                |
| Age (years)                  |                 |       |                                                 |                              |                |
| $\geq 60$                    | 38              | 45.78 | 8.960 $\pm$ 1.557                               | Z=1.549                      | 0.121          |
| <60                          | 45              | 54.22 | 8.411 $\pm$ 1.413                               |                              |                |
| Gender                       |                 |       |                                                 |                              |                |
| Male                         | 47              | 56.63 | 8.718 $\pm$ 1.479                               | Z=0.505                      | 0.613          |
| Female                       | 36              | 43.37 | 8.590 $\pm$ 1.538                               |                              |                |
| Smoking History              |                 |       |                                                 |                              |                |
| Nonsmoker                    | 59              | 71.08 | 8.509 $\pm$ 1.497                               | Z=1.527                      | 0.127          |
| Smoker                       | 24              | 28.92 | 9.040 $\pm$ 1.457                               |                              |                |
| Alcohol History              |                 |       |                                                 |                              |                |
| Nondrinker                   | 53              | 63.86 | 8.670 $\pm$ 1.534                               | Z=0.038                      | 0.970          |
| Drinker                      | 30              | 36.14 | 8.649 $\pm$ 1.454                               |                              |                |
| Tumor Size(cm)               |                 |       |                                                 |                              |                |
| $\leq 4$                     | 55              | 66.27 | 8.844 $\pm$ 1.495                               | Z=1.560                      | 0.119          |
| >4                           | 28              | 33.73 | 8.304 $\pm$ 1.460                               |                              |                |
| Lymph Node Metastasis        |                 |       |                                                 |                              |                |
| pN0                          | 51              | 61.45 | 8.592 $\pm$ 1.472                               | Z=0.379                      | 0.705          |
| pN1 to pN3                   | 32              | 38.55 | 8.774 $\pm$ 1.553                               |                              |                |
| TNM Stage                    |                 |       |                                                 |                              |                |
| I-II                         | 41              | 49.40 | 8.500 $\pm$ 1.455                               | Z=0.765                      | 0.444          |
| III-IV                       | 42              | 50.60 | 8.821 $\pm$ 1.537                               |                              |                |
| Pathological Differentiation |                 |       |                                                 |                              |                |
| Well                         | 37              | 44.58 | 8.387 $\pm$ 1.465                               | Z=1.379                      | 0.168          |
| Moderately/poorly            | 46              | 55.42 | 8.885 $\pm$ 1.500                               |                              |                |
| Tumor Type                   |                 |       |                                                 |                              |                |
| Primary                      | 67              | 80.72 | 8.553 $\pm$ 1.436                               | Z=1.160                      | 0.246          |
| Recurrent                    | 16              | 19.28 | 9.119 $\pm$ 1.704                               |                              |                |
| Efficacy of TPF regimen      |                 |       |                                                 |                              |                |
| Sensitive                    | 39              | 46.99 | 9.946 $\pm$ 0.898                               | Z=7.309                      | <b>0.000**</b> |
| Resistant                    | 44              | 53.01 | 7.524 $\pm$ 0.860                               |                              |                |

\*\*  $p < 0.01$

Abbreviations: SD, standard deviation; pN, pathological lymph node status; TNM stage, tumor-lymph node-metastasis stage.

a  $\Delta$ Ct indicates the difference in the cycle number at which a sample's fluorescent signal passes a given threshold above baseline (Ct) derived from a specific gene compared with that of GAPDH in tumor tissues.



1 **Table S3.** Relationship between lnc-POP1-1 level and clinicopathologic features  
 2 (N=83)

| Characteristics              | No. of Patients |       | Lnc-POP1-1 $\Delta$ Ct <sup>a</sup><br>Mean $\pm$ SD | Non-parametric<br>test value | P value        |
|------------------------------|-----------------|-------|------------------------------------------------------|------------------------------|----------------|
|                              | No.             | %     |                                                      |                              |                |
| Age (years)                  |                 |       |                                                      |                              |                |
| $\geq 60$                    | 38              | 45.78 | 10.586 $\pm$ 1.811                                   | Z=0.361                      | 0.718          |
| <60                          | 45              | 54.22 | 10.176 $\pm$ 1.665                                   |                              |                |
| Gender                       |                 |       |                                                      |                              |                |
| Male                         | 47              | 56.63 | 10.273 $\pm$ 1.655                                   | Z=0.671                      | 0.502          |
| Female                       | 36              | 43.37 | 10.482 $\pm$ 1.852                                   |                              |                |
| Smoking History              |                 |       |                                                      |                              |                |
| Nonsmoker                    | 59              | 71.08 | 10.364 $\pm$ 1.729                                   | Z=0.332                      | 0.740          |
| Smoker                       | 24              | 28.92 | 10.361 $\pm$ 1.787                                   |                              |                |
| Alcohol History              |                 |       |                                                      |                              |                |
| Nondrinker                   | 53              | 63.86 | 10.254 $\pm$ 1.755                                   | Z=0.711                      | 0.477          |
| Drinker                      | 30              | 36.14 | 10.558 $\pm$ 1.712                                   |                              |                |
| Tumor Size(cm)               |                 |       |                                                      |                              |                |
| $\leq 4$                     | 55              | 66.27 | 10.491 $\pm$ 1.799                                   | Z=0.732                      | 0.464          |
| >4                           | 28              | 33.73 | 10.113 $\pm$ 1.604                                   |                              |                |
| Lymph Node Metastasis        |                 |       |                                                      |                              |                |
| pN0                          | 51              | 61.45 | 10.313 $\pm$ 1.846                                   | Z=0.281                      | 0.779          |
| pN1 to pN3                   | 32              | 38.55 | 10.444 $\pm$ 1.568                                   |                              |                |
| TNM Stage                    |                 |       |                                                      |                              |                |
| I-II                         | 41              | 49.40 | 10.175 $\pm$ 1.877                                   | Z=1.070                      | 0.284          |
| III-IV                       | 42              | 50.60 | 10.548 $\pm$ 1.585                                   |                              |                |
| Pathological Differentiation |                 |       |                                                      |                              |                |
| Well                         | 37              | 44.58 | 10.217 $\pm$ 1.904                                   | Z=0.912                      | 0.362          |
| Moderately/poorly            | 46              | 55.42 | 10.481 $\pm$ 1.598                                   |                              |                |
| Tumor Type                   |                 |       |                                                      |                              |                |
| Primary                      | 67              | 80.72 | 10.407 $\pm$ 1.779                                   | Z=0.600                      | 0.548          |
| Recurrent                    | 16              | 19.28 | 10.183 $\pm$ 1.579                                   |                              |                |
| Efficacy of TPF regimen      |                 |       |                                                      |                              |                |
| Sensitive                    | 39              | 46.99 | 11.915 $\pm$ 0.860                                   | Z=7.287                      | <b>0.000**</b> |
| Resistant                    | 44              | 53.01 | 8.988 $\pm$ 0.983                                    |                              |                |

\*\*  $p < 0.01$

Abbreviations: SD, standard deviation; pN, pathological lymph node status; TNM stage, tumor-lymph node-metastasis stage.

a  $\Delta$ Ct indicates the difference in the cycle number at which a sample's fluorescent signal passes a given threshold above baseline (Ct) derived from a specific gene compared with that of GAPDH in tumor tissues.

1 **Table S4.** The sequences of Inc-POP1-1 Smart Silencer.

| Product Name              | Sequences (5'-3')     |
|---------------------------|-----------------------|
| Inc-POP1-1 Smart Silencer | GCCATGAGTGAGCCACCTT   |
|                           | CTACAGAAATCATGAGAGA   |
|                           | AGTTCCCTCAAGTGTGAAA   |
|                           | CAACTGACATCCAACCTACAA |
|                           | AGCCAAGCTGTCCCTGAATT  |
|                           | AATCTACCTCCTTCACTGAC  |

2

3 **Table S5.** The sequences of ASO and siRNA.

| Product Name        | Target Sequences (5'-3')      |
|---------------------|-------------------------------|
| ASO-Inc-POP1-1 (1)* | CAACTGACATCCAACCTACAA         |
| ASO-Inc-POP1-1 (2)  | AGCCAAGCTGTCCCTGAATT          |
| ASO-Inc-POP1-1 (3)  | AATCTACCTCCTTCACTGAC          |
| si-Sp1              | CTCCCAACTTACAGAACCA           |
| si-NF-κB            | AAAAAAAAAGGGACTTTCATTGTACTGGT |
| si-Fos              | GGGATAGCCTCTCTTACTA           |
| si-JUN              | CCAACATGCTCAGGGAACA           |
| si-TBP              | CCTAAAGACCATTGCACTT           |
| si-PKA              | ATGTTTGAAAGGATAGTCAAAGC       |
| si-MCM5             | GCATCTACTCCATCAAGAA           |

4 \* The sequence of ASO-Inc-POP1-1 cholesterol-conjugated for *in vivo* ASO delivery.

5

6 **Table S6.** VN1R5-CRISPR/cas9-sgRNA target sequences.

| NO.     | TargetSeq            |
|---------|----------------------|
| sgRNA 1 | TCTAAGATGATCAAACCTCC |
| sgRNA 2 | GTGACTAATTATCATGTCAA |
| sgRNA 3 | GCAGTATGTGGATGAGAGAC |

1 **Table S7.** Sequences of Inc-POP1-1 promoter ChIP primers.

| No. |         | Sequences (5'-3')           |
|-----|---------|-----------------------------|
| 1   | Forward | TCTCCTCTTTGATTTCTCTGCTGC    |
|     | Reverse | CACAGTTGGGGTGCAAGGG         |
| 2   | Forward | TATGCCATACAGAATCAATTTTGGGTG |
|     | Reverse | GTGAAATGATATAGCAGTGAGAGTGAG |
| 3   | Forward | CCAGGCTGGAGTGAAGTGG         |
|     | Reverse | GATCACCTGAAGTCAGGAGCTCA     |

2

3 **Table S8.** Sequences of RIP primers for Inc-POP1-1.

| No. |         | Sequences (5'-3')              |
|-----|---------|--------------------------------|
| P1  | Forward | CTGGCCTGTGTGATGAATAGAATATGATGG |
|     | Reverse | GCTGGCTTCCTGCAGAGC             |
| P2  | Forward | GGAAGCCAGCTGCCATCC             |
|     | Reverse | CTCCCAAGGTGGCTCACTCAT          |
| P3  | Forward | ACCTTGGGAGGGGAACCTC            |
|     | Reverse | CAGGGACAGCTTGGCTGG             |
| P4  | Forward | CTGTCCCTGAATTCCTGACCTACAGA     |
|     | Reverse | CCATGAGCTCCCACCTGCG            |
| P5  | Forward | AGCTCATGGCGTGGGAAG             |
|     | Reverse | GGAGACTAATCAGCTTTGCCTTGG       |
| P6  | Forward | CTGATTAGTCTCCCTGAGCCTCAG       |
|     | Reverse | CTCCAATCCTGGTGGCACTGA          |

4
